# Supplementary material
Source: PubMed Central journal article supplement (PMC9216314)

# Supplementary Figure 1. Flowchart

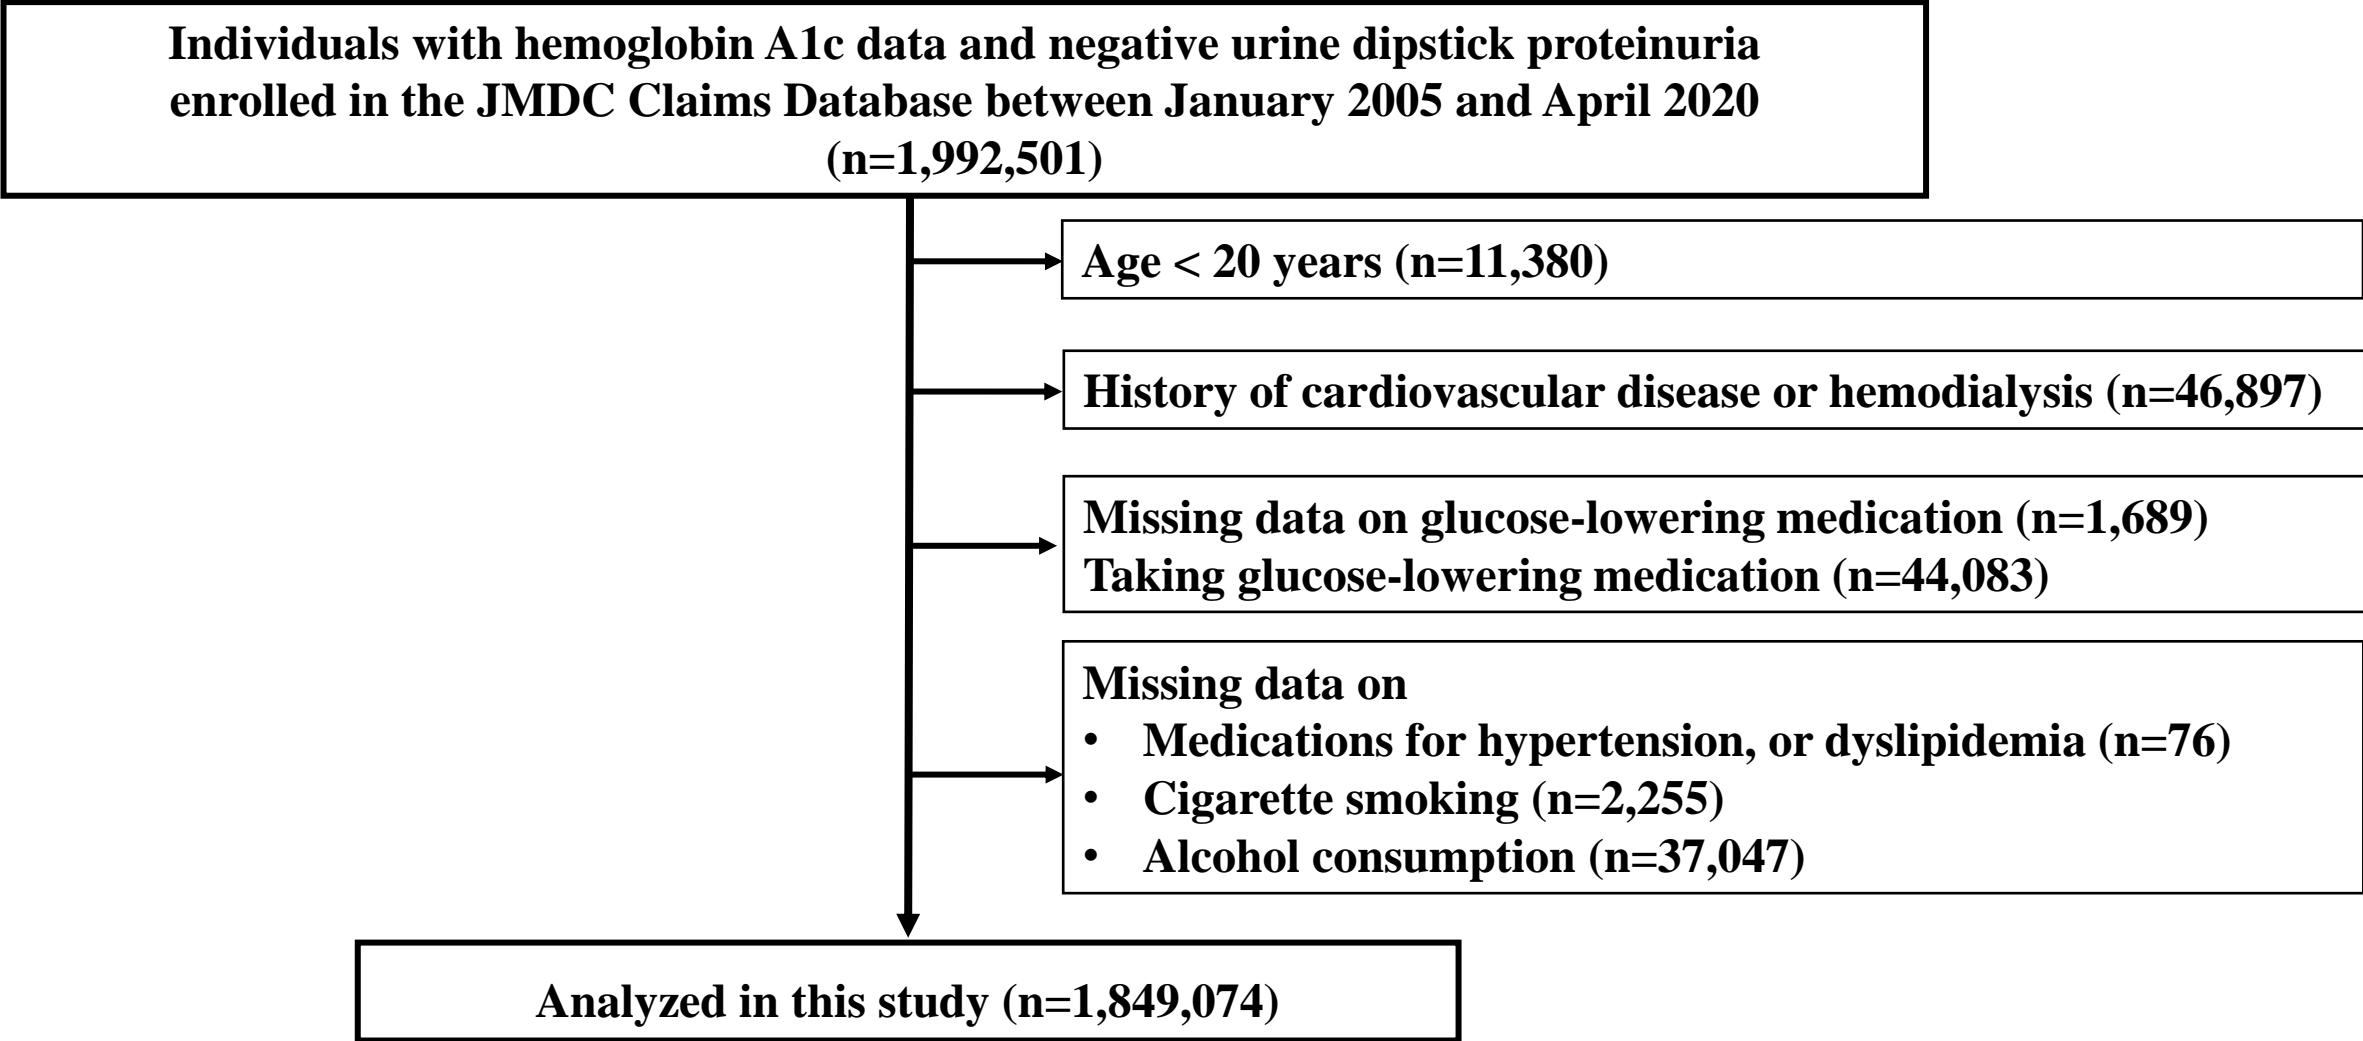

# Supplementary Figure 2. Fasting plasma glucose category and proteinuria

| Fasting Plasma Glucose category    | Number    | Events       | Model 1          | Model 2          | Model 3          | Low risk | High risk |
|------------------------------------|-----------|--------------|------------------|------------------|------------------|----------|-----------|
| Normal Fasting Plasma Glucose      | 1,215,932 | 39,833 (3.3) | 1 [Reference]    | 1 [Reference]    | 1 [Reference]    |          |           |
| Normal-High Fasting Plasma Glucose | 221,684   | 7,828 (3.5)  | 1.08 (1.06-1.11) | 1.16 (1.13-1.18) | 1.06 (1.03-1.09) |          |           |
| Impaired Fasting Glucose           | 73,275    | 3,313 (4.5)  | 1.40 (1.35-1.45) | 1.56 (1.50-1.62) | 1.32 (1.27-1.37) |          |           |
| Diabetes Mellitus                  | 25,983    | 1,875 (7.2)  | 2.29 (2.18-2.40) | 2.54 (2.43-2.67) | 1.99 (1.90-2.09) |          |           |
| P for trend                        | -----     | -----        | < 0.001          | < 0.001          | < 0.001          | 0.6      | 2.2       |

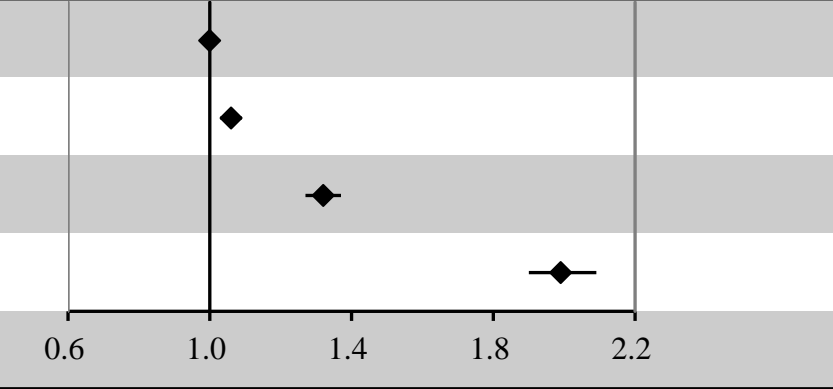

**Supplementary Figure 3. Restricted cubic spline**

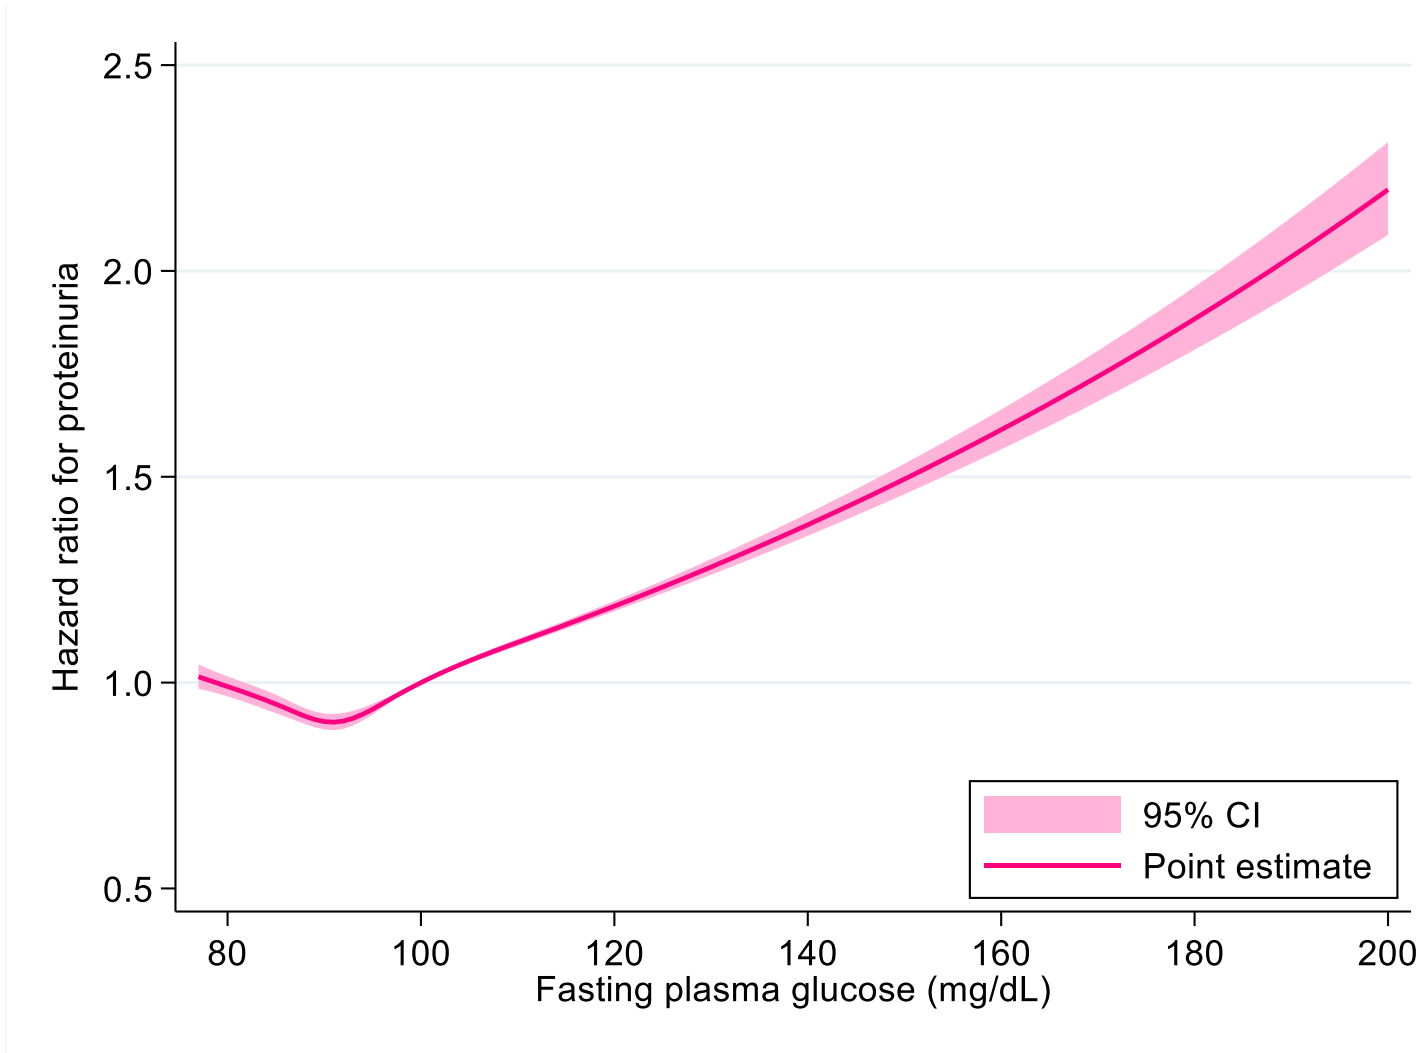

# Supplementary Figure 4. Change in fasting plasma glucose and proteinuria

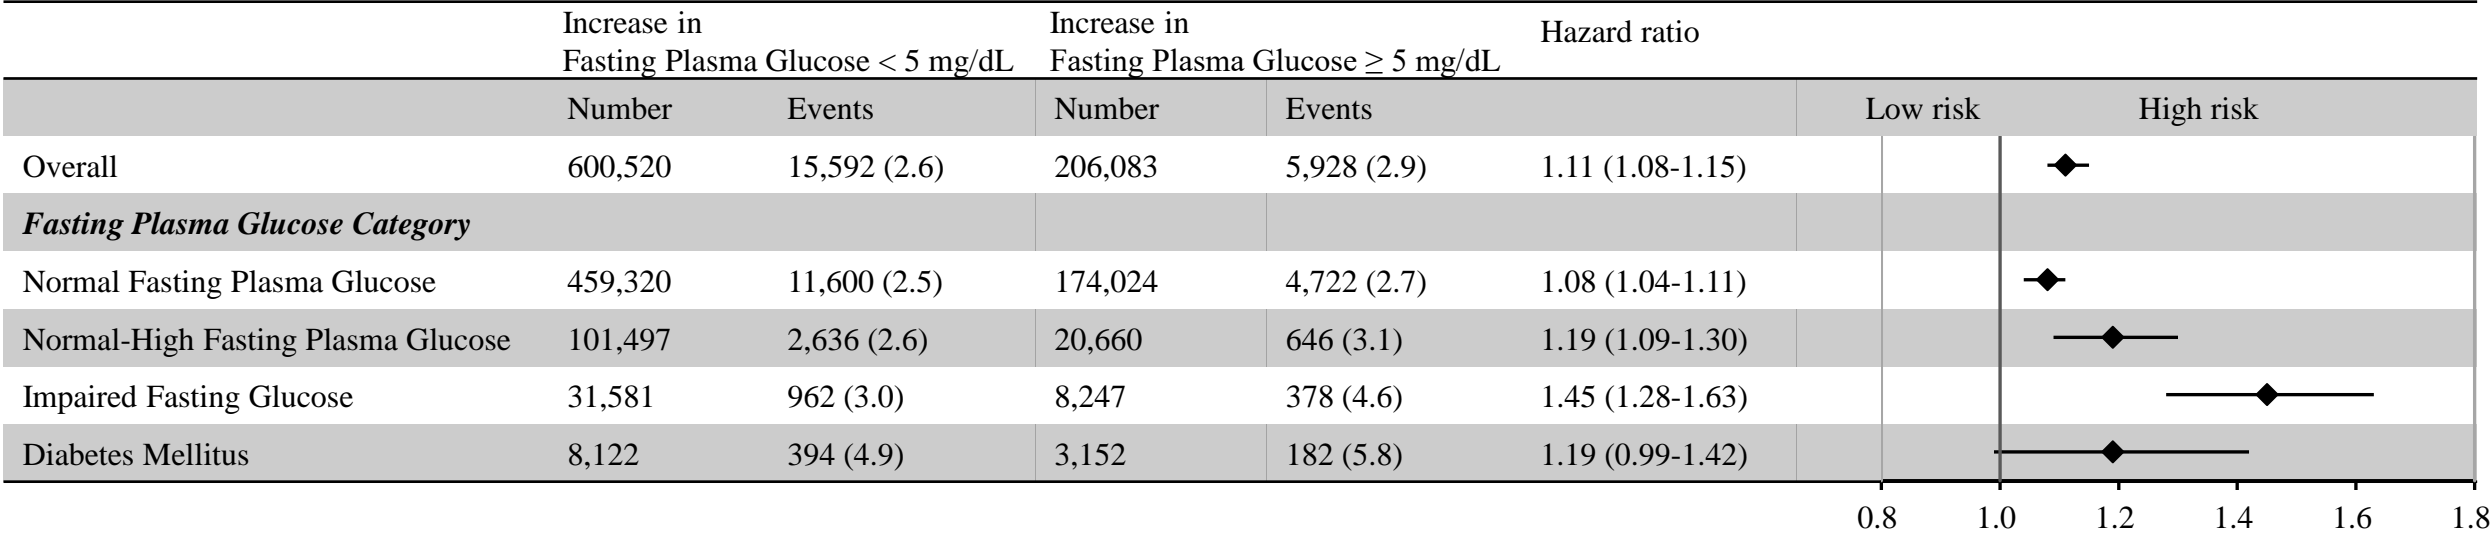

Supplement: ajn-0053-0307-s02.pdf [file ajn-0053-0307-s02.pdf]
